# Supplementary material for: Regulation of Fibroblast Activation Protein by Transforming Growth Factor Beta-1 in Glioblastoma Microenvironment
Source: Int J Mol Sci. 2021 Jan 21;22(3):1046. doi: 10.3390/ijms22031046 (PMC7864518; doi:10.3390/ijms22031046)
Supplement: Supplementary file 1 [file ijms-22-01046-s001.pdf]

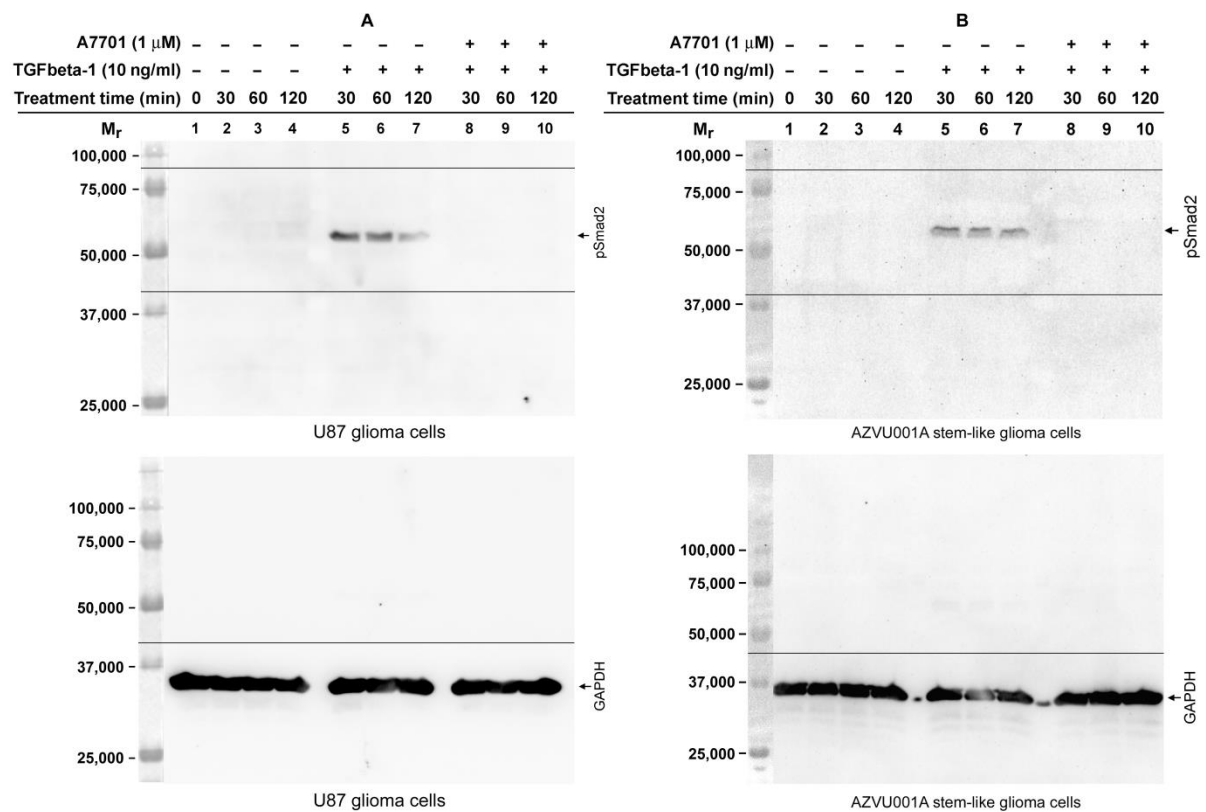

**Figure 1S.** Western blot analysis of TGFbeta-1-induced phosphorylation of Smad2 protein in glioma cells. Source images (A) and (B) showing the full length immunoblotting membranes after the detection of pSmad2 (upper halves) and GAPDH (lower halves) proteins in the TGFbeta-1 treated FAP-upregulating U87 glioma cells and FAP-non-upregulating AZVU001A glioma stem-like cells. These images were cropped to obtain the respective Figures 8A and 8B. The cropping lines are shown.
